# Supplementary material for: Development and validation of forensically useful growth models for Central European population of Creophilus maxillosus L. (Coleoptera: Staphylinidae)
Source: Springer Nature journal article supplement (doi:10.1007/s00414-020-02275-3), 2020-04-08
Supplement: MOESM1 [file 17878882]

## SUPPLEMENTARY TABLES FOR

Development and validation of forensically useful growth models for Central European population of *Creophilus maxillosus* L. (Coleoptera: Staphylinidae)

Katarzyna Frątczak-Łagiewska<sup>1-3\*</sup>, Andrzej Grzywacz<sup>4</sup>, Szymon Matuszewski<sup>1-2</sup>

<sup>1</sup>Laboratory of Criminalistics, Adam Mickiewicz University, Św. Marcin 90, 61-809 Poznań, Poland

<sup>2</sup>Centre for Advanced Technologies, Adam Mickiewicz University, Uniwersytetu Poznańskiego 10, 61-614 Poznań, Poland

<sup>3</sup>Department of Animal Taxonomy and Ecology, Adam Mickiewicz University, Uniwersytetu Poznańskiego 6, 61-614 Poznań, Poland

<sup>4</sup>Department of Ecology and Biogeography, Faculty of Biological and Veterinary Sciences, Nicolaus Copernicus University, Lwowska 1, 87-100 Toruń, Poland

\*Corresponding author: [katarzyna.fratczak@amu.edu.pl](mailto:katarzyna.fratczak@amu.edu.pl)

### Content

Table 1. Estimated parameters and goodness of fit (*AICc*) of the nonlinear developmental models for five developmental events of *C. maxillosus*.

| Model       | Parameter               | Hatching  | First ecdysis | Second ecdysis | Pupation                | Eclosion               |
|-------------|-------------------------|-----------|---------------|----------------|-------------------------|------------------------|
| Analytis    | <i>a</i>                | 0.0006601 | 0.00001843    | 0.00003636     | 2.665*10 <sup>-24</sup> | 2.75*10 <sup>-33</sup> |
|             | <i>n</i>                | 0.5332    | 0.4214        | 0.4868         | 0.1004                  | 0.1003                 |
|             | <i>m</i>                | 3.721     | 1.458         | 1.493          | 0.1709                  | 0.1155                 |
|             | <i>T<sub>min</sub></i>  | 2.7       | 2.46          | 3.63           | -2.027                  | -16.73                 |
|             | <i>T<sub>max</sub></i>  | 42.27     | 42.89         | 44.71          | 48.43                   | 77.99                  |
|             | <i>T<sub>fast</sub></i> | 33.17     | 33.83         | 34.60763       | 29.75                   | 33.98                  |
|             | <i>AICc</i>             | -85.19    | -104.52       | -102.91        | -65.05                  | -82.08                 |
| Brière-2    | <i>a</i>                | 0.003927  | 0.000210755   | 0.00008685     | 4.994*10 <sup>-18</sup> | 1.185*10 <sup>-7</sup> |
|             | <i>d</i>                | 3.638     | 3.30341       | 2.227          | 0.1643                  | 0.5709                 |
|             | <i>T<sub>min</sub></i>  | 6.298     | 5.8819        | 5.663          | 10.78                   | 10.64                  |
|             | <i>T<sub>max</sub></i>  | 36.16     | 37.36         | 40.62          | 185.8                   | 69.73                  |
|             | <i>T<sub>fast</sub></i> | 32.23     | 32.89         | 33.75          | 50.45                   | 40.04                  |
|             | <i>AICc</i>             | -87.03    | -105.57       | -104.85        | -86.05                  | -87.6                  |
| Lactin-2    | <i>P</i>                | 0.1206    | 0.11875       | 0.10366        | 0.01043                 | 0.008049               |
|             | $\Delta T$              | 8.1806    | 8.35294       | 9.56126        | 52.63348                | 12.35552               |
|             | $\lambda$               | -0.1166   | -0.06909      | -0.06475       | -0.71485                | -0.03712               |
|             | <i>T<sub>max</sub></i>  | 40.15     | 40.65775      | 42.34          | 129.31                  | 46.84                  |
|             | <i>T<sub>fast</sub></i> | 31.85     | 32.21         | 32.67          | 35                      | 34.37                  |
| <i>AICc</i> | -85.08                  | -101.79   | -103.62       | -87.06         | -86.81                  |                        |

*T<sub>min</sub>* is the lower developmental threshold, *T<sub>max</sub>* is the upper developmental threshold, *T<sub>fast</sub>* is the temperature of the fastest development the and *a*, *n*, *m*, *d*, *p*,  $\Delta T$  and  $\lambda$  are estimated model parameters.
