# Supplementary material for: Development and validation of forensically useful growth models for Central European population of Creophilus maxillosus L. (Coleoptera: Staphylinidae)
Source: Springer Nature journal article supplement (doi:10.1007/s00414-020-02275-3), 2020-04-08
Supplement: MOESM2 [file 17878882]

## SUPPLEMENTARY FIGURES FOR

### Development and validation of forensically useful growth models for Central European population of *Creophilus maxillosus* L. (Coleoptera: Staphylinidae)

Katarzyna Frątczak-Łagiewska<sup>1-3\*</sup>, Andrzej Grzywacz<sup>4</sup>, Szymon Matuszewski<sup>1-2</sup>

<sup>1</sup>Laboratory of Criminalistics, Adam Mickiewicz University, Św. Marcin 90, 61-809 Poznań, Poland

<sup>2</sup>Centre for Advanced Technologies, Adam Mickiewicz University, Uniwersytetu Poznańskiego 10, 61-614 Poznań, Poland

<sup>3</sup>Department of Animal Taxonomy and Ecology, Adam Mickiewicz University, Uniwersytetu Poznańskiego 6, 61-614 Poznań, Poland

<sup>4</sup>Department of Ecology and Biogeography, Faculty of Biological and Veterinary Sciences, Nicolaus Copernicus University, Lwowska 1, 87-100 Toruń, Poland

\*Corresponding author: [katarzyna.fratzak@amu.edu.pl](mailto:katarzyna.fratzak@amu.edu.pl)

#### **Content**

Fig. 1. Lactin-2 models fit to observed developmental rates of five development events of *C. maxillosus*. Black circles indicate observed data.

Fig. 2. Brière-2 models fit to observed developmental rates of five development events of *C. maxillosus*. Black circles indicate observed data.

Fig. 3. Analytis models fit to observed developmental rates of five development events of *C. maxillosus*. Black circles indicate observed data.

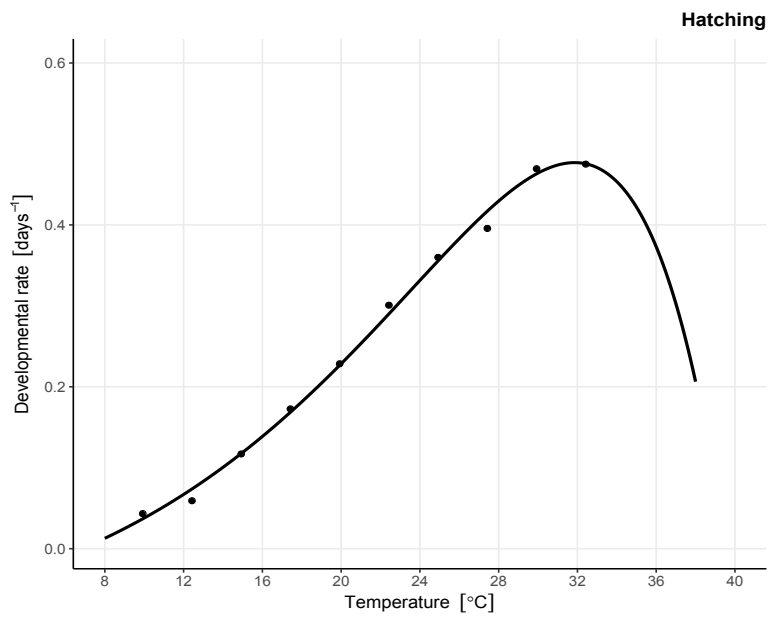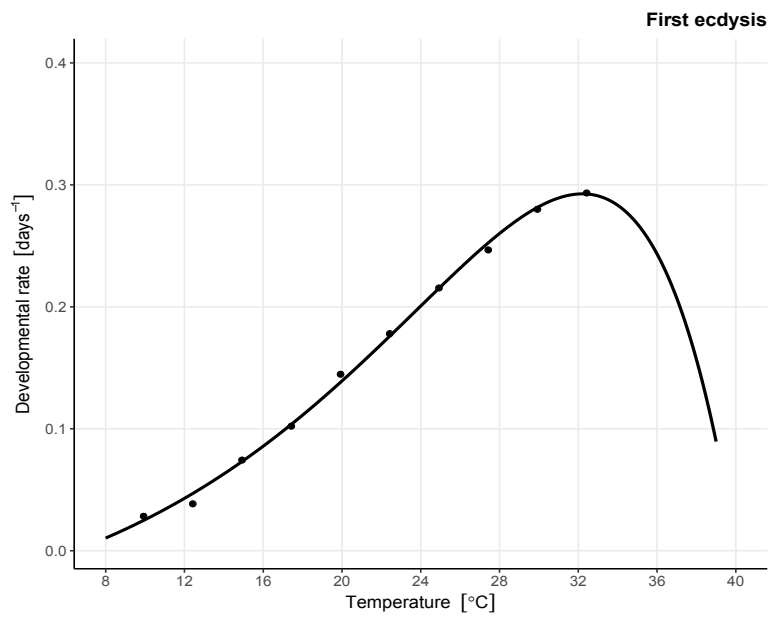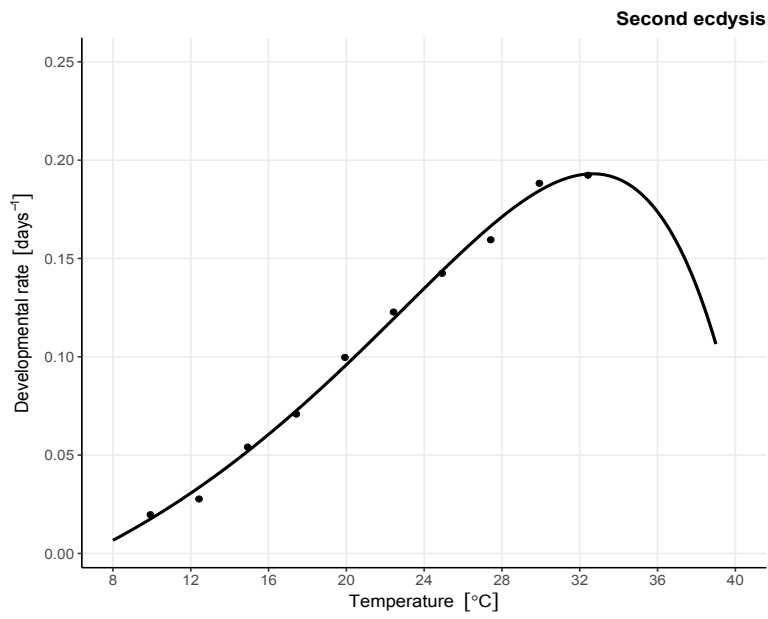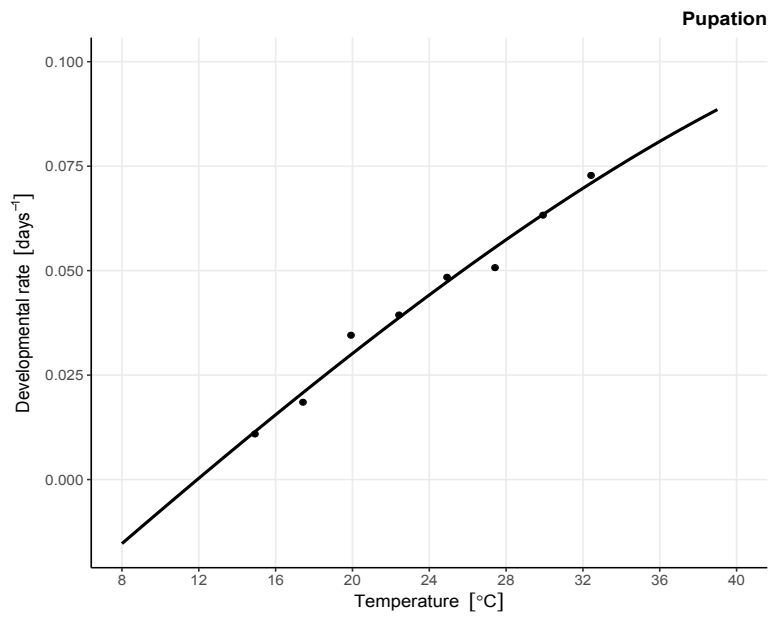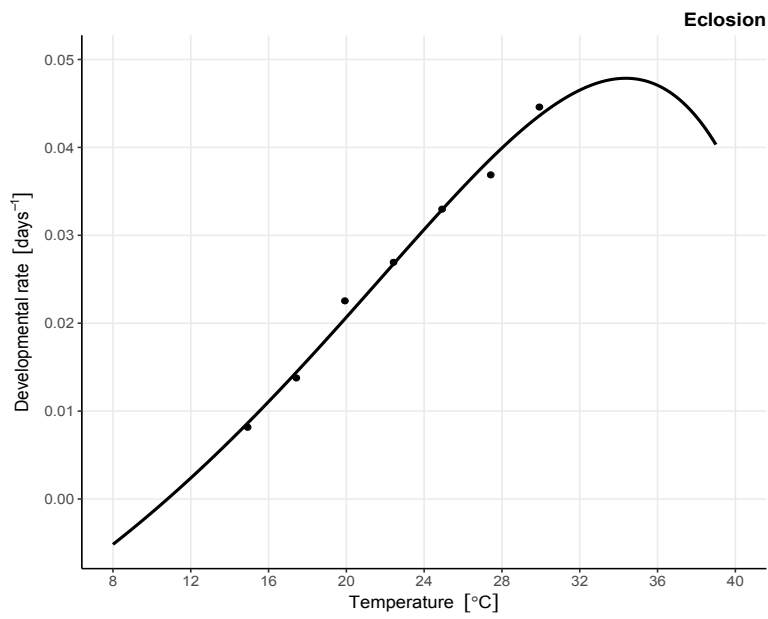

Fig. 1. Lactin-2 models fit to observed developmental rates of five development events of *C. maxillosus*. Black circles indicate observed data.

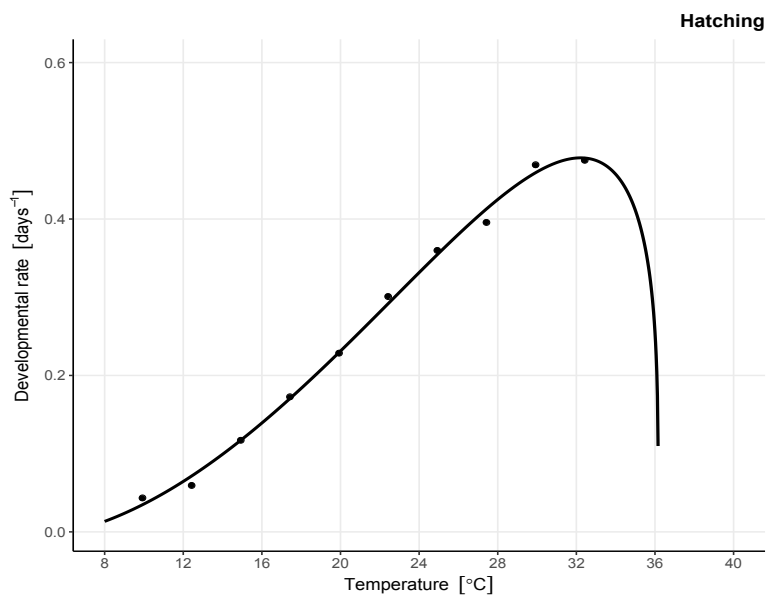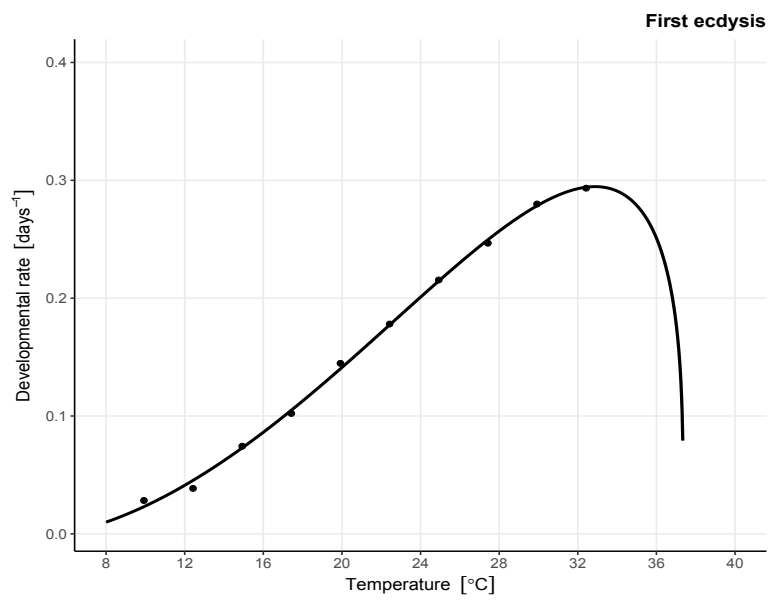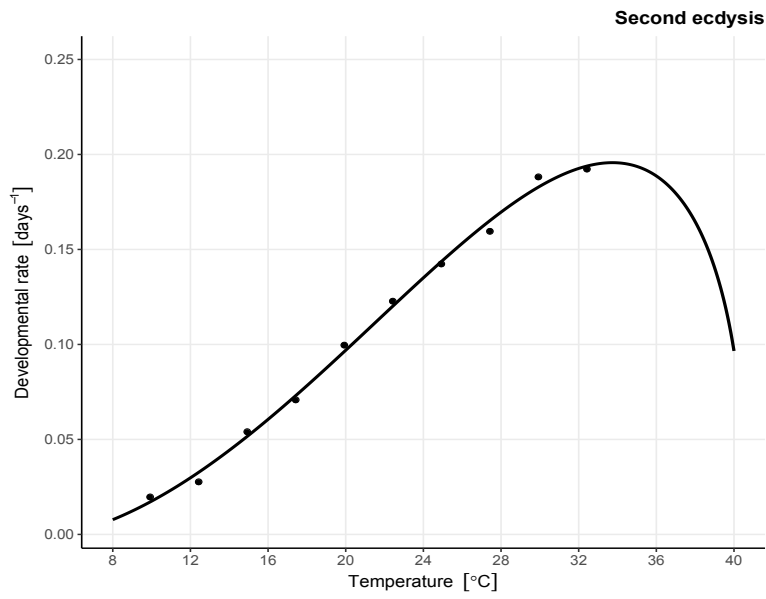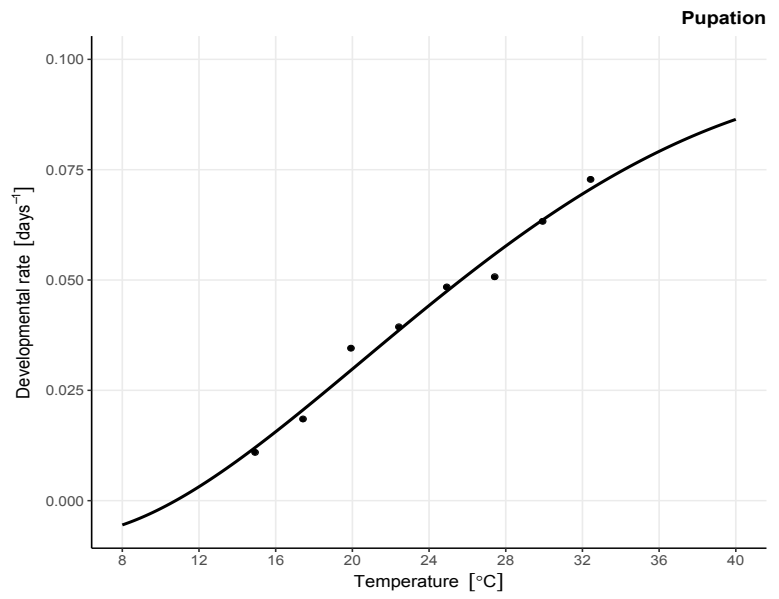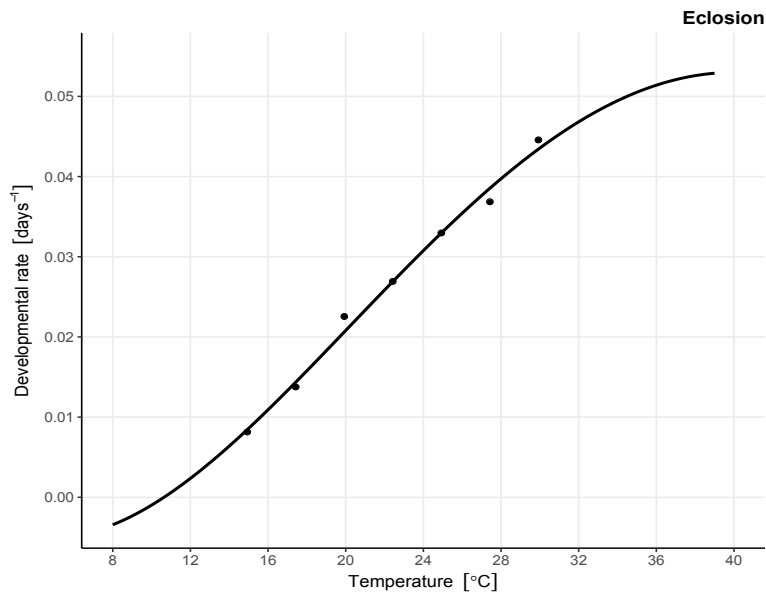

Fig. 2. Brière-2 models fit to observed developmental rates of five development events of *C. maxillosus*. Black circles indicate observed data.

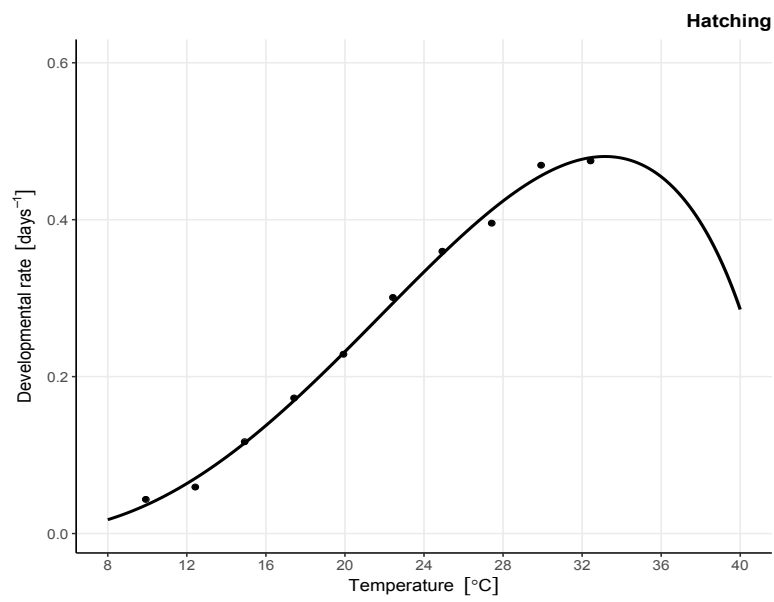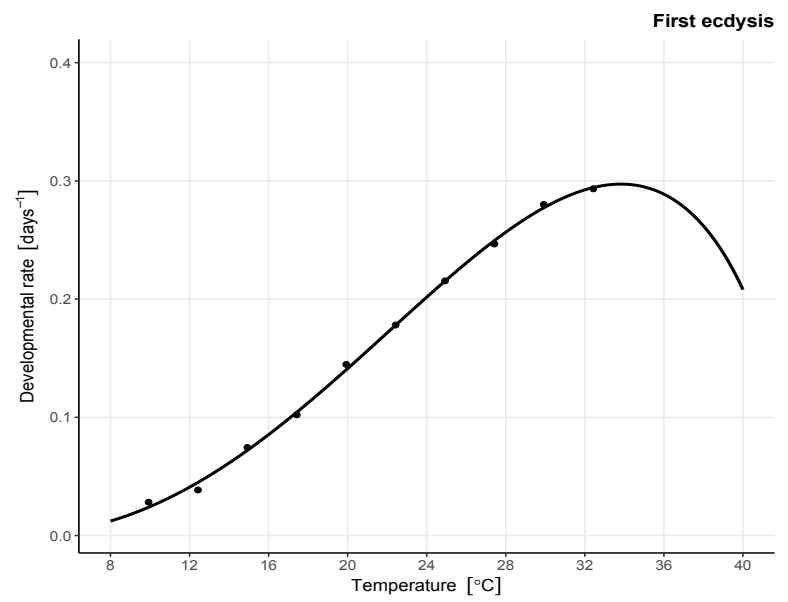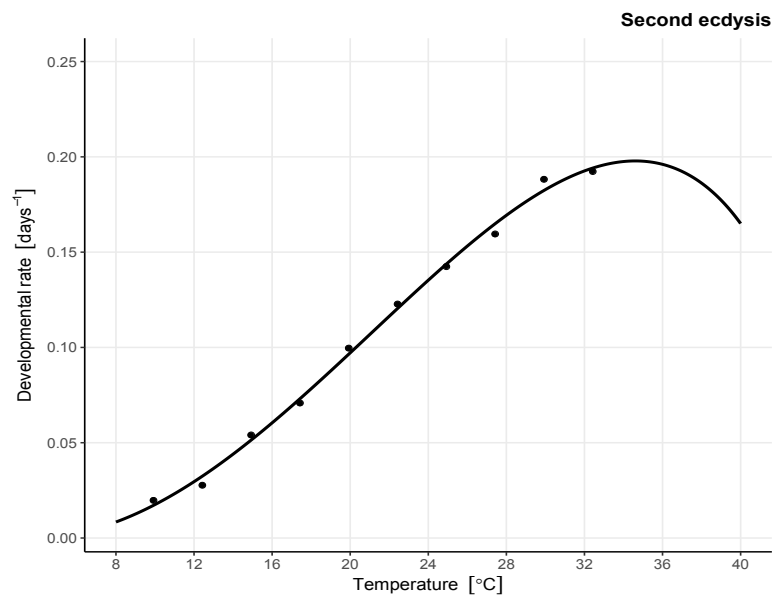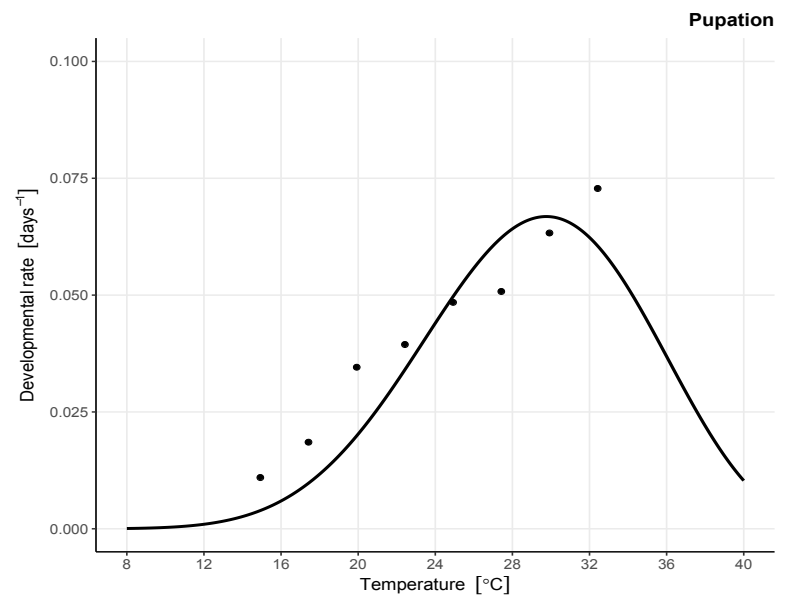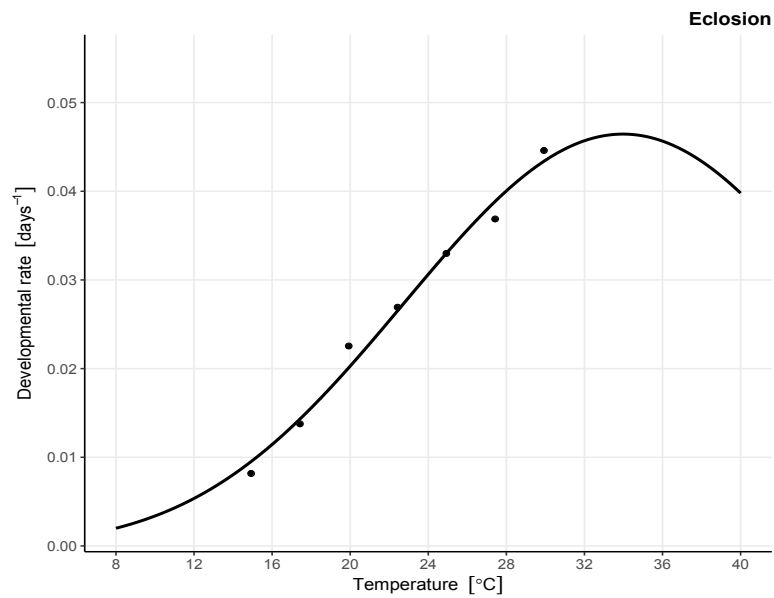

Fig. 3. Analytis models fit to observed developmental rates of five development events of *C. maxillosus*. Black circles indicate observed data.
